# Supplementary material for: Magnetic nanoparticles with fluorescence and affinity for DNA sensing and nucleus staining
Source: Royal Society of Chemistry journal article supplement (doi:10.1039/c6ra25610d), 2017-01-01
Supplement: c6ra25610d1.pdf [file c6ra25610d1.pdf]

## 1 **Electronic Supplementary Information**

2

3 TGA of MNPs was carried out in Fig. S2. The results of weight loss for MNPs and Hoechst MNPs were  
4 10% and 14%, respectively. Hoechst attached on the MNP account for the extra 4% weight loss as compared  
5 to that of MNPs. This fact supports that Hoechst was successfully conjugated on the MNPs.  
6 Superparamagnetism is especially important in applications such as targeting delivery since the elimination  
7 of the magnetic force for aggregation. Moreover, superparamagnetic nanoparticles provide a strong response  
8 to an external magnetic field (Fig. S3). Two typical magnetization curves for magnetic nanoparticles showed  
9 the characteristic sigmoidal curve under an external field. The saturation magnetization values of MNPs and  
10 Hoechst MNPs were 20 and 40 emu/g Fe, respectively. The modified iron oxides are superparamagnetic and  
11 show negligible hysteresis. A typical TEM photograph of MNPs is shown in Fig. S4. The morphology of  
12 two kinds of MNPs can be observed. The size distribution of both MNPs was uniform with the average size  
13 of  $8.25 \pm 0.96$  nm. The size of Hoechst MNPs was around  $14.60 \pm 2.43$  nm. Additionally, 6 nm increase in  
14 MNPs' size was observed after Hoechst modification. Effect of pH values on surface potential of MNPs was  
15 summarized in Fig. S4. The surface charges (zeta potentials) on the surfaces of the nanoparticles were also  
16 studied by using the Zetasizer (Malvern). Solutions with different pH values were used to study the surface  
17 charge on the surfaces of nanoparticles. These magnetic nanoparticles could be well suspended in the  
18 various pH solutions without precipitation. Fluorescence emission spectra of various MNPs synthesized at  
19 different pH values and Hoechst dye are shown in Fig. S5. The results indicated that Hoechst MNPs  
20 synthesized at pH 11 had the strongest fluorescence when in contact with DNA. The fluorescence photos of  
21 Hoechst MNPs and DNA mixture (Fig. S6) also supported this conclusion.

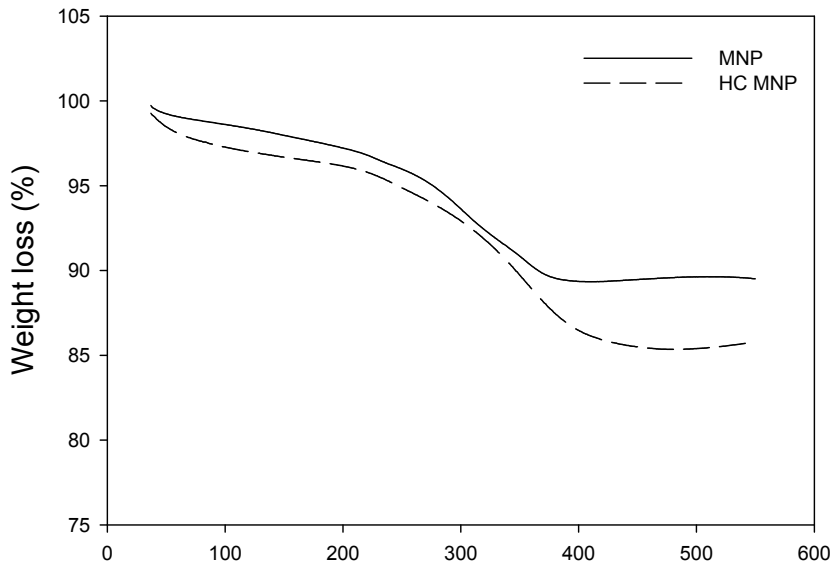

22  
23 Fig. S1. TGA profile of MNPs and Hoechst MNPs.

24 Thermogravimetric analysis (TGA) was conducted using a Perkin-Elmer TGA 7 at a constant heating rate of  
25 10 °C/min from room temperature to 550 °C in a nitrogen environment.

26  
27

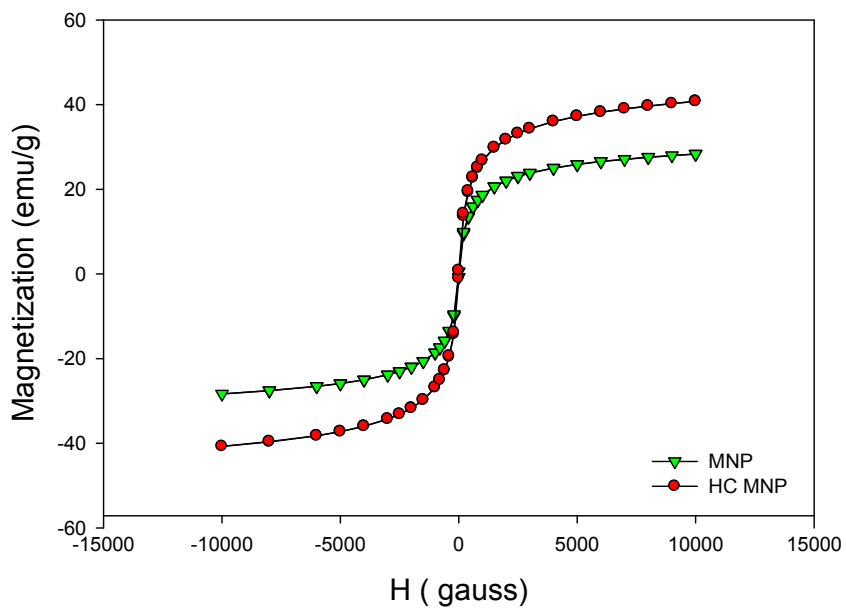

28

29

30 Fig. S2. Magnetization curve as a function of magnetic field for MNPs and Hoechst MNPs at a temperature  
 31 of 25 °C.

32

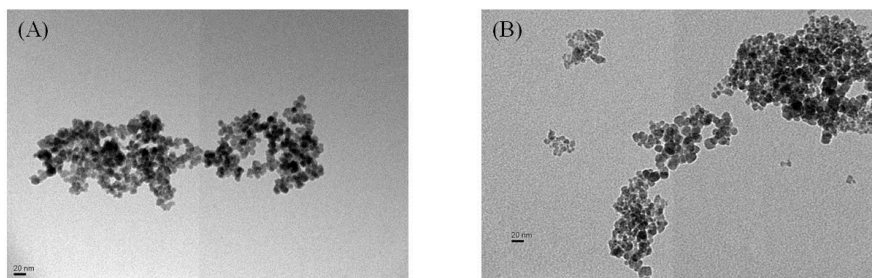

33 Fig. S3. TEM microstructure for MNPs (A) and Hoechst MNPs (B). The scale bar is 20 nm. The  
 34 magnification is 300K.

35

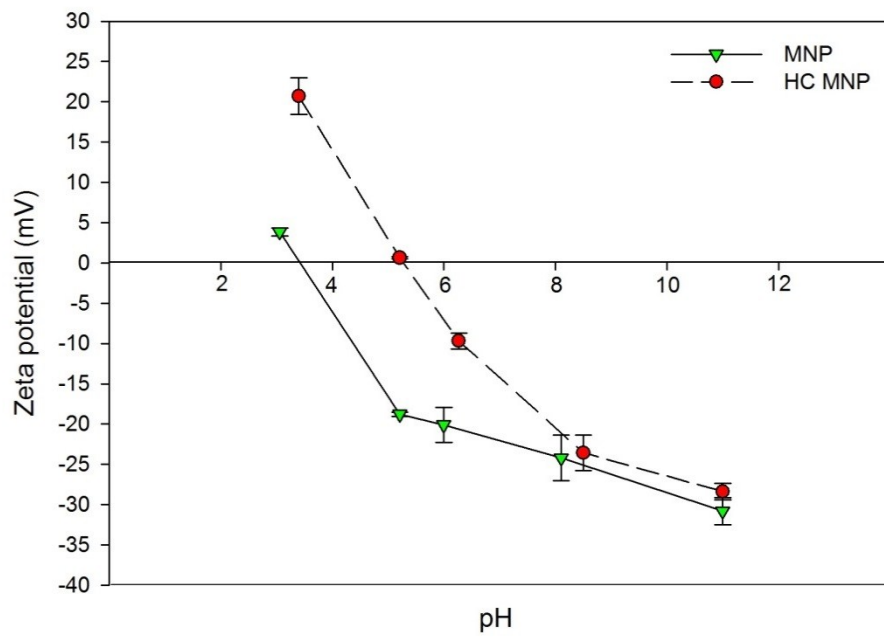

36

37 Fig. S4. Zeta potential of MNPs and Hoechst MNPs at different pH values. The data are the average of  
38 triplicate experiments.

39

40

41

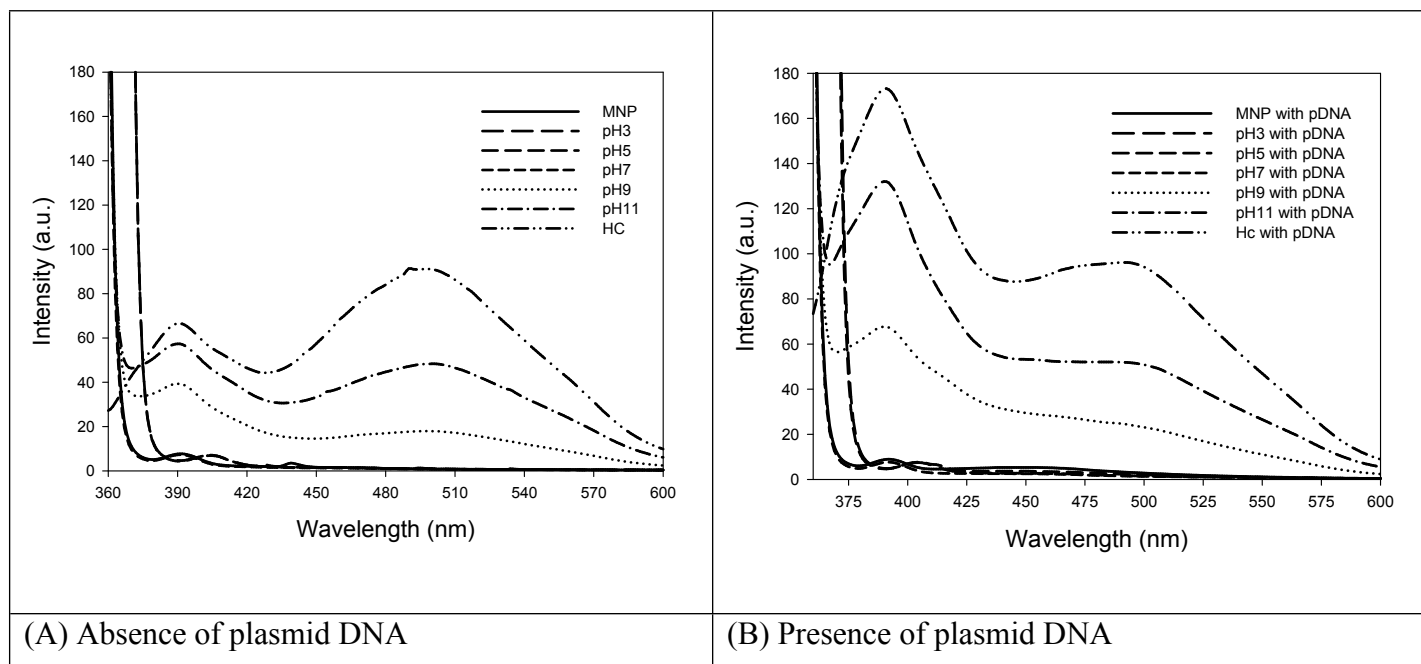

42

Fig. S5. Fluorescence emission spectra of bare MNPs, various Hoechst MNPs synthesized at different

43

pH values and Hoechst dye in the absence (A) or presence (B) of plasmid DNA. The Hoechst MNPs

44

were synthesized at different pH conditions.

45

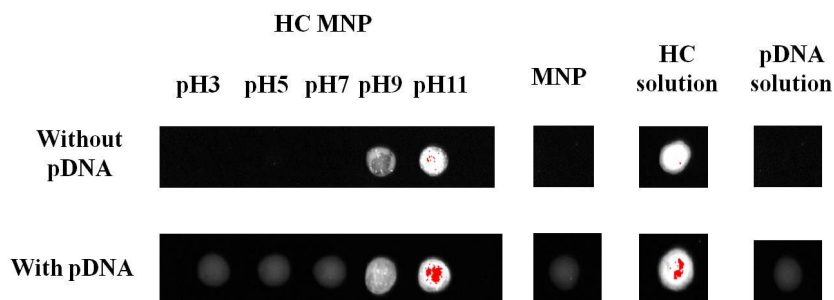

46

47

Fig. S6. Fluorescent photos of bare MNPs, Hoechst MNPs synthesized at different pH conditions and free

48

Hoechst in the absence (A) or presence (B) of plasmid DNA. Plasmid DNA (556 ng/ $\mu$ L, 10  $\mu$ L) was mixed

49

with Hoechst MNPs (10  $\mu$ L) and Hoechst under a UV lamp (302 nm). The stock concentrations of Hoechst

50

and Hoechst-MNPs were 1700  $\mu$ g/mL and 1000  $\mu$ g/mL, respectively.

51

52

The Fourier transform infrared spectra of the original MNPs (containing carboxyl groups) and Hoechst-

53

modified magnetic particles are presented in Fig. (S7A and B). The Hoechst MNPs showed distinct peaks at

54

1631  $\text{cm}^{-1}$ , and these have been reportedly attributed to the stretching of the amide I band<sup>41</sup>. Based on the

55 above results, it was confirmed that HC MNPs was successfully formed.

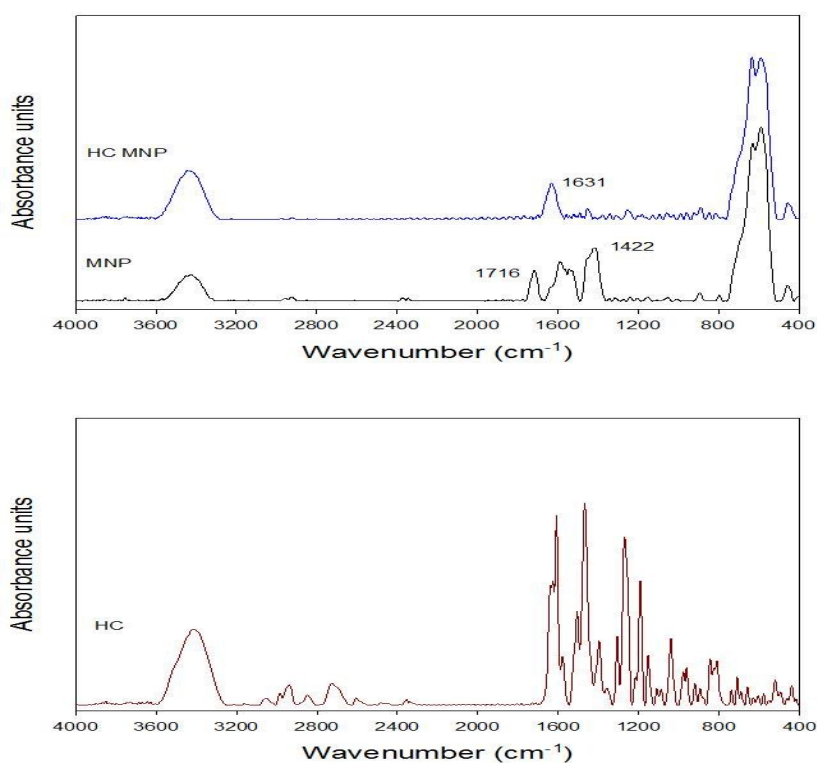

56 Fig. S7. FTIR spectra of HC MNPs, MNPs (A) and HC (B).

57

58

59 Fluorescent photos of ssDNA and pDNA adsorption by HC MNPs are shown in Fig. S8. Different  
60 concentrations of DNA in presence of 0.5M CaCl<sub>2</sub> are incubated for 30 minutes at RT and after magnetic  
61 separations, the DNA adsorbed by HC MNPs and the remaining DNA in the supernatant were imaged under  
62 a UV lamp (302 nm), Bio-Rad imaging system. The remaining DNA in the supernatant was much less than  
63 the separated DNA. From the DNA intensity in the images, we found that less than 20~30% of unbound  
64 DNA remained in the supernatant. These results roughly indicated that the high capacity of HC MNPs for  
65 pDNA and ssDNA.

66

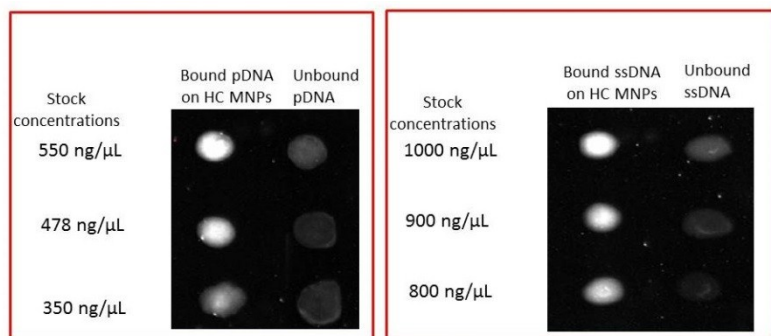

67

68 Fig. S8. Images of the unbound DNA after the adsorption and the adsorbed DNA using the Bio-Rad imaging  
 69 system. Plasmid DNA (350-550 ng/μL, 10 μL) or ssDNA (800-1000 ng/μL, 10 μL) was incubated with  
 70 Hoechst MNPs (10 μL) and 0.5M CaCl<sub>2</sub> for 30 minutes at RT. After magnetic separation, HC MNPs with  
 71 DNA and the remaining DNA in the supernatant were imaged under a UV lamp (302 nm), Bio-Rad imaging  
 72 system.

73

74 The hydrodynamic diameters of MNPs and HC MNPs in aqueous solution were determined by dynamic  
 75 light scattering (DLS) analysis (Table S1). The results indicated that the dispersion of MNPs and HC MNPs  
 76 in water exhibits poorly stabilized and aggregated. The diameter of MNPs and HC MNPs increased in water,  
 77 while in PBS and cell culture medium (DMEM) the aggregation properties reduced and diameter decreased.  
 78 The observed hydrodynamic diameter of HC MNPs in cell culture medium is 68.7 nm. The possible  
 79 stabilizing agent in medium is serum albumin, which carries a negative charge at physiologic pH and  
 80 therefore may stabilize the particles by imparting a net surface charge<sup>42</sup>. Compared to the size observed in  
 81 TEM, the corresponding hydrodynamic diameters of MNPs and HC MNPs are much larger. Table S1.  
 82 However, the size ranges from 10-100 nm of the nanoparticles can be efficiently endocytosis by various  
 83 types of cells<sup>43</sup>.

84

85 Table S1. Hydrodynamic size distribution of MNPs and HC MNPs dispersed in DDW, PBS, and Medium  
 86 (DMEM).

| MNPs         | Medium (DMEM) | PBS    | DDW      |
|--------------|---------------|--------|----------|
| MNPs         | 49.6 nm       | 110 nm | 135.7 nm |
| Hoechst MNPs | 68.7 nm       | 118 nm | 143.6 nm |

87
